# Supplementary material
Source: Springer Nature journal article supplement (https://www.springermedizin.de/resource/supplementary/12874_2005_150_MOESM5_ESM.pdf/9433874)

**Pravastatin (n=64)**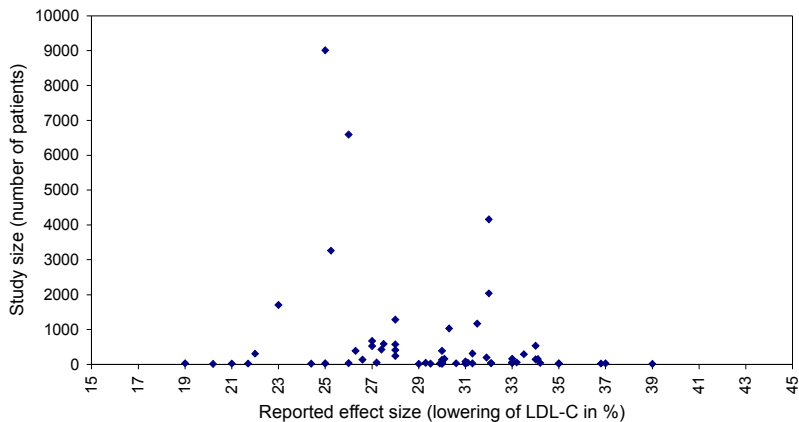**Atorvastatin (n=35)**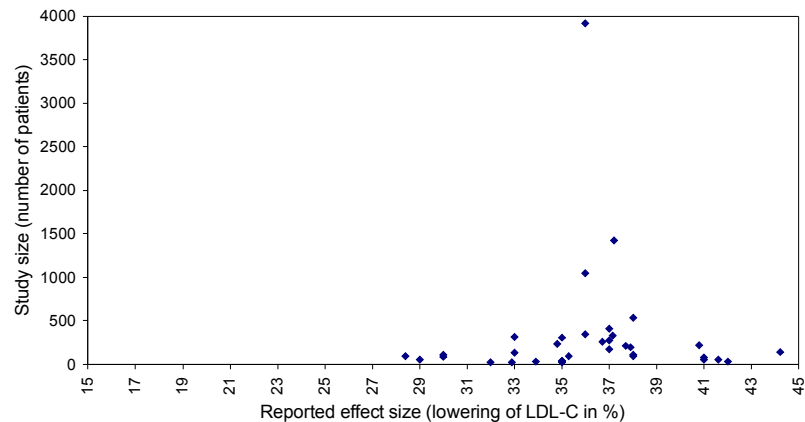**Timolol (n=75)**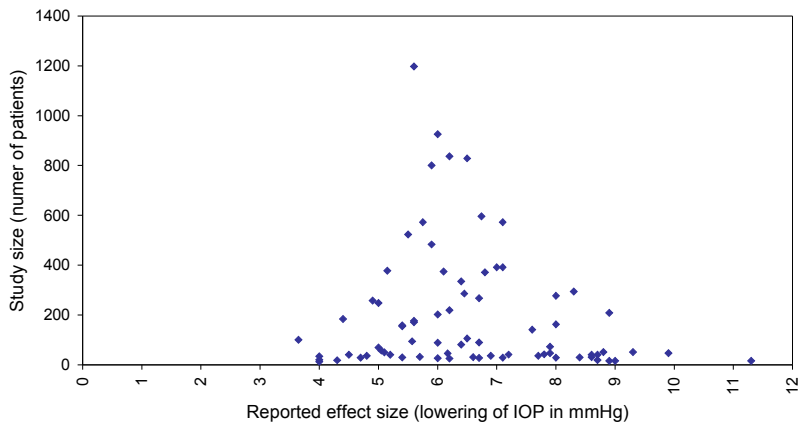**Latanoprost (n=32)**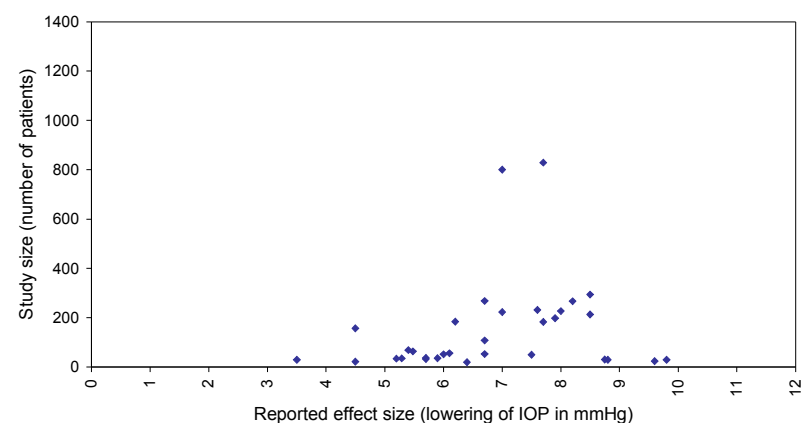

Supplement: MOESM5 [file 9433874]
